# Supplementary material for: Baseline Characteristics from UNITE: An Observational, International, Multicentre Registry to Evaluate Hidradenitis Suppurativa (Acne Inversa) in Clinical Practice
Source: PubMed Central journal article supplement — Am J Clin Dermatol. 2020 Feb 19;21(4):579–90. doi: 10.1007/s40257-020-00504-4 (PMC7371670; doi:10.1007/s40257-020-00504-4), 2020-02-19
Supplement: 40257_2020_504_MOESM1_ESM.pdf [file 40257_2020_504_MOESM1_ESM.pdf]

**Baseline Characteristics from UNITE: An Observational, International, Multicentre Registry to Evaluate Hidradenitis Suppurativa in Clinical Practice**

**Authors and Affiliations:**

Errol P. Prens, MD, PhD<sup>1</sup>; Aida M Lugo-Somolinos, MD<sup>2</sup>; Amy S. Paller, MD, FAAD<sup>3</sup>; Francisco Kerdel, MD<sup>4</sup>; Yinghui Duan, PhD<sup>5</sup>; Henrique D. Teixeira, PhD, MBA<sup>5</sup>; Michelle Longcore, PharmD<sup>5</sup>; Alexa B. Kimball, MD, MPH<sup>6</sup>

1 Erasmus University Medical Center, Rotterdam, Netherlands; or CHU de Reims, Hôpital Robert Debré, Service de Dermatologie, Reims Cedex, France

2 University of North Carolina Hospital, Dermatology and Skin Cancer Center, Chapel Hill, NC, USA

3 Northwestern University Feinberg School of Medicine, Chicago, IL, USA

4 Florida Academic Dermatology Centers, Miami, FL, USA

5 AbbVie, Inc, North Chicago, IL, USA

6 Harvard Medical School and Beth Israel Deaconess Hospital, Boston, MA, United States

**Journal:** American Journal of Clinical Dermatology

**Counts:** Words: Abstract 239; Body 3001. Tables:7. Figures: 1. Online Resource: 1

**Corresponding author:**

Errol P Prens, MD, PhD  
Erasmus University Medical Center  
Dr. Molewaterplein 40  
Post Box 2040  
Rotterdam 3014 GD, Netherlands  
Phone: (31) 10 703 4580  
Email: [e.prens@erasmusmc.nl](mailto:e.prens@erasmusmc.nl)

## Online Resource 1. Lesion Assessment

| Body Area | Anatomic Region              | Body Area              | Anatomic Region        |
|-----------|------------------------------|------------------------|------------------------|
| Mammary   | Intermammary area            | Other                  | Scalp                  |
|           | Sub/inframammary area, left  |                        | Face <sup>a</sup>      |
|           | Sub/inframammary area, right |                        | Neck                   |
| Pelvic    | Buttock, left                |                        | Abdomen                |
|           | Buttock, right               |                        | Chest <sup>b</sup>     |
|           | Inguino-cural fold, left     |                        | Back                   |
|           | Inguino-cural fold, right    |                        | Pubic region           |
|           | Perianal                     |                        | Genital region         |
|           | Perineal                     |                        | Upper extremity, left  |
| Axilla    | Axilla, left                 |                        | Upper extremity, right |
|           | Axilla right                 |                        | Lower extremity, left  |
|           |                              | Lower extremity, right |                        |

a. includes ears and area behind the ears. b. excludes the mammary, inframammary, intermammary areas.
